# Supplementary material
Source: publisher site journal article supplement (https://www.dovepress.com/article/160018)

## **Supplemental legend**

**Supplemental Figure 1.** Trends in pancreatic cancer incidence during 2000-2014 stratified by gender subgroups.

**Supplemental Figure 2.** Trends in pancreatic cancer mortality during 2001-2014 stratified by gender subgroups.

**Supplemental Figure 3.** Trends in pancreatic cancer incidence during 2000-2014 stratified by race subgroups.

**Supplemental Figure 4.** Trends in pancreatic cancer mortality during 2001-2014 stratified by race subgroups.

**Supplemental Figure 5.** Trends in pancreatic cancer incidence during 2000-2014 stratified by SEER stage subgroups.

**Supplemental Figure 6.** Trends in pancreatic cancer mortality during 2001-2014 stratified by SEER stage subgroups.

**Supplemental Figure 7.** Trends in pancreatic cancer incidence during 2000-2014 stratified by site subgroups.

**Supplemental Figure 8.** Trends in pancreatic cancer mortality during 2001-2014 stratified by site subgroups.

**Supplemental Figure 9.** Trends in pancreatic cancer incidence during 2000-2014 stratified by size subgroups.

**Supplemental Figure 10.** Trends in pancreatic cancer mortality during 2001-2014 stratified by size subgroups.

Figure S1.

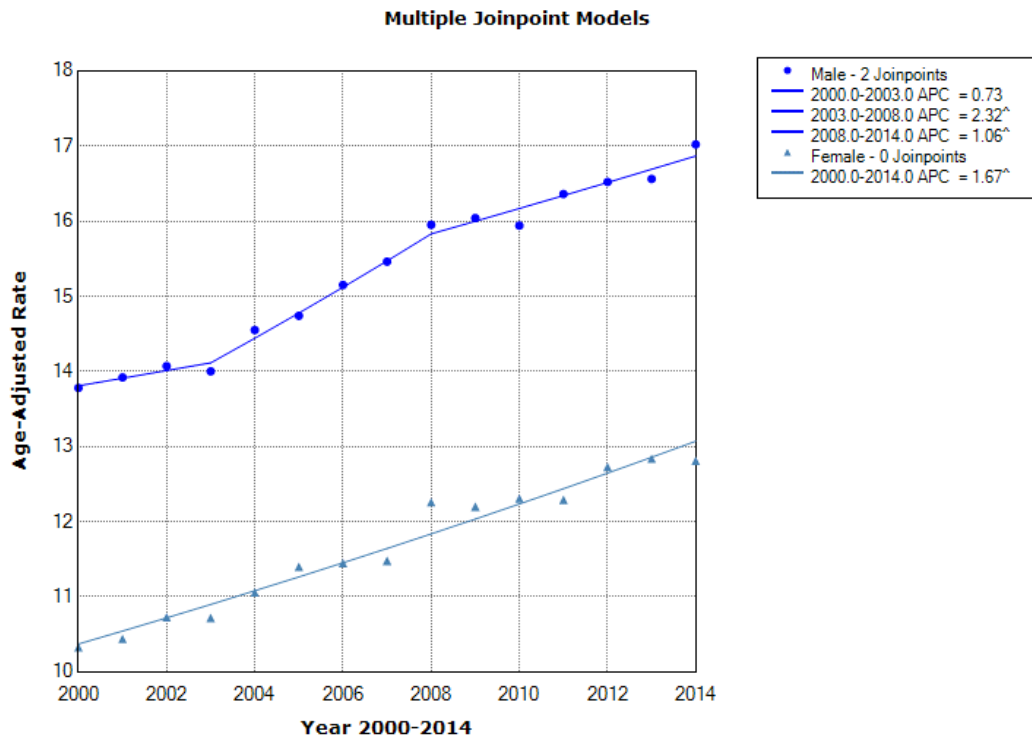

Figure S2.

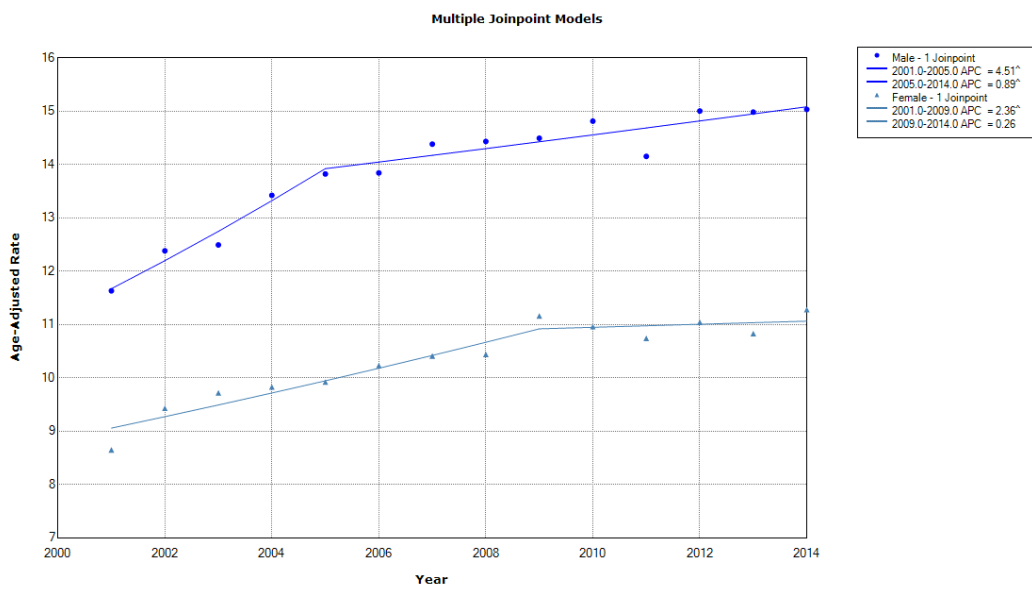

Figure S3.

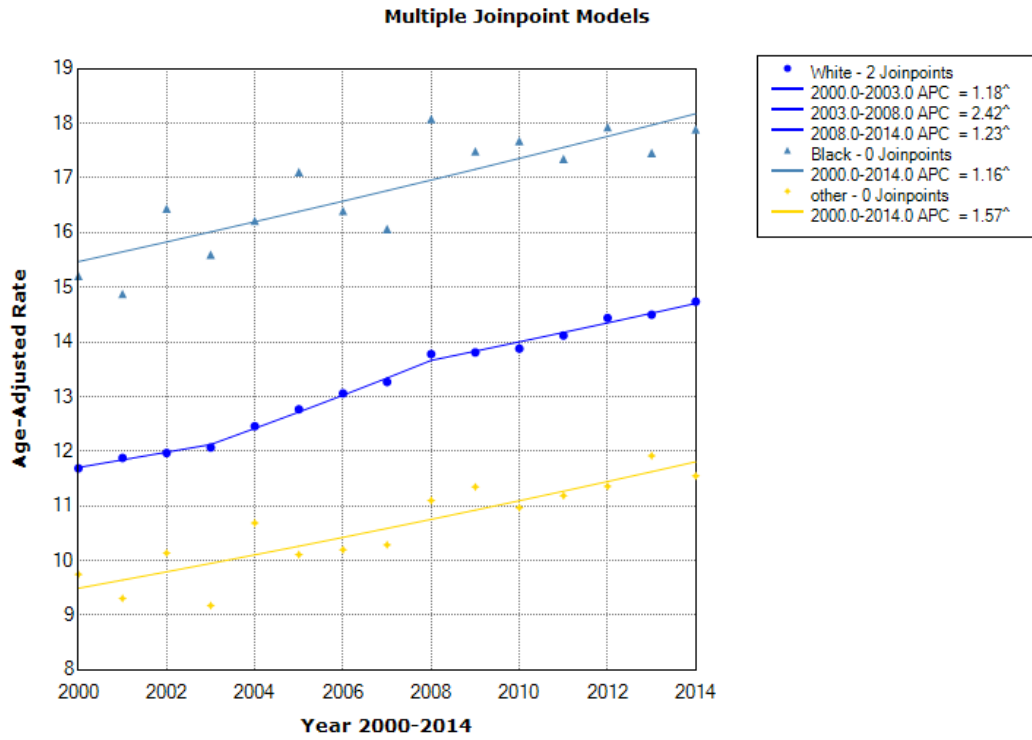

Figure S4

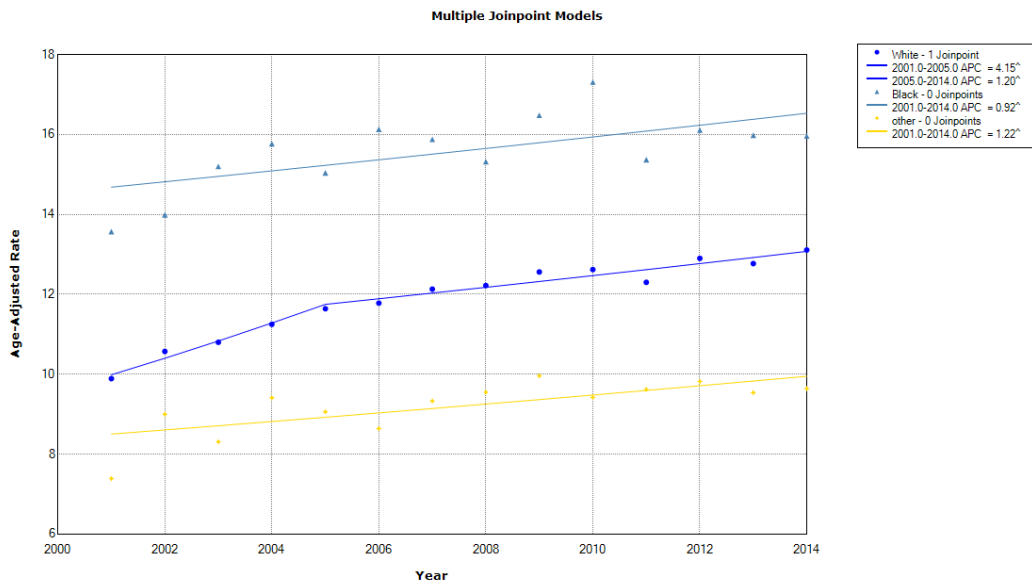

Figure S5.

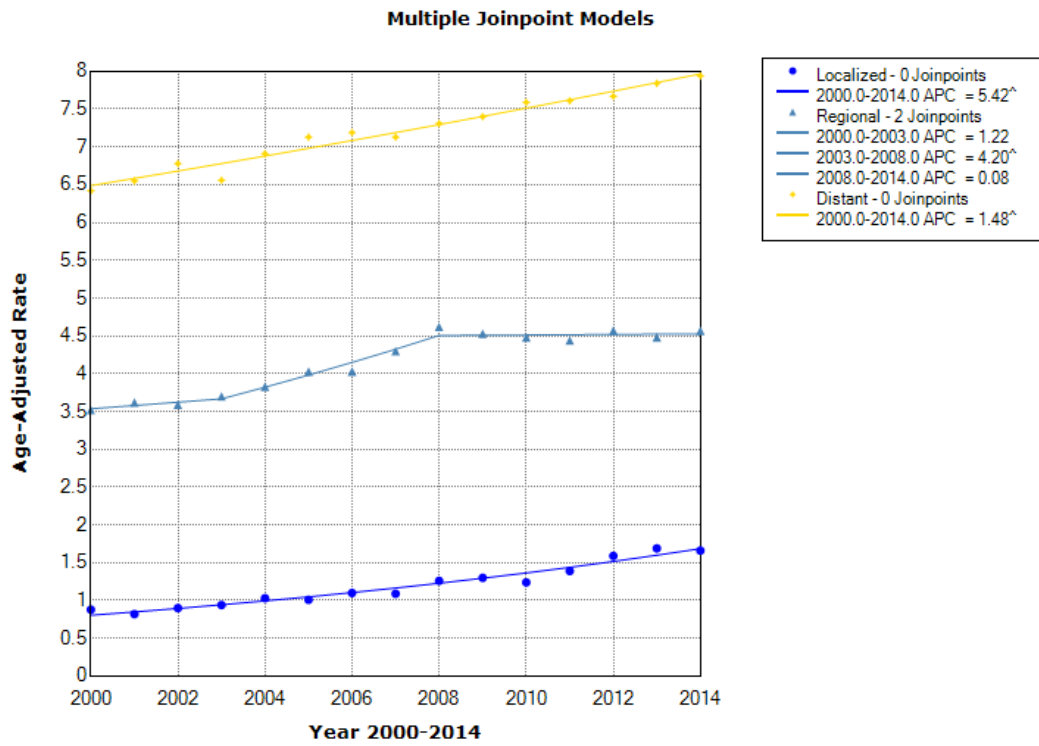

Figure S6.

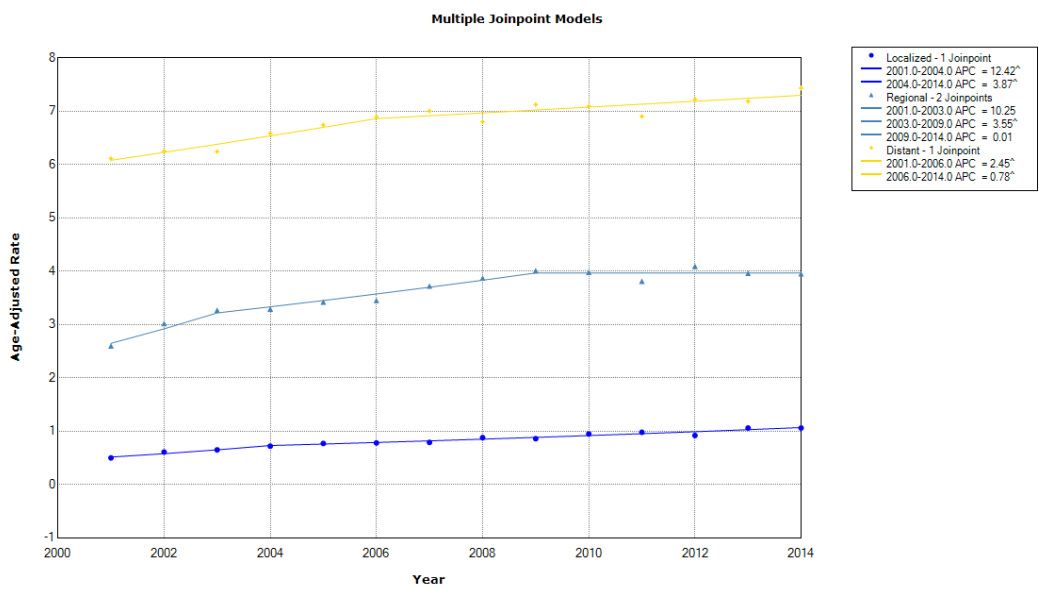

Figure S7.

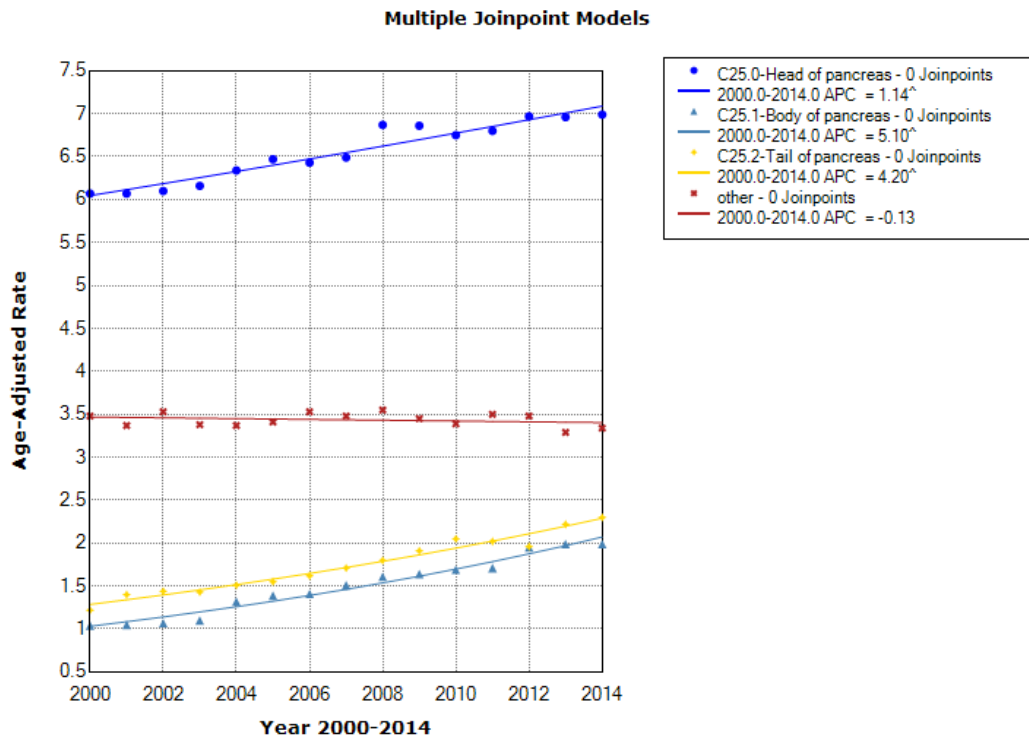

Figure S8.

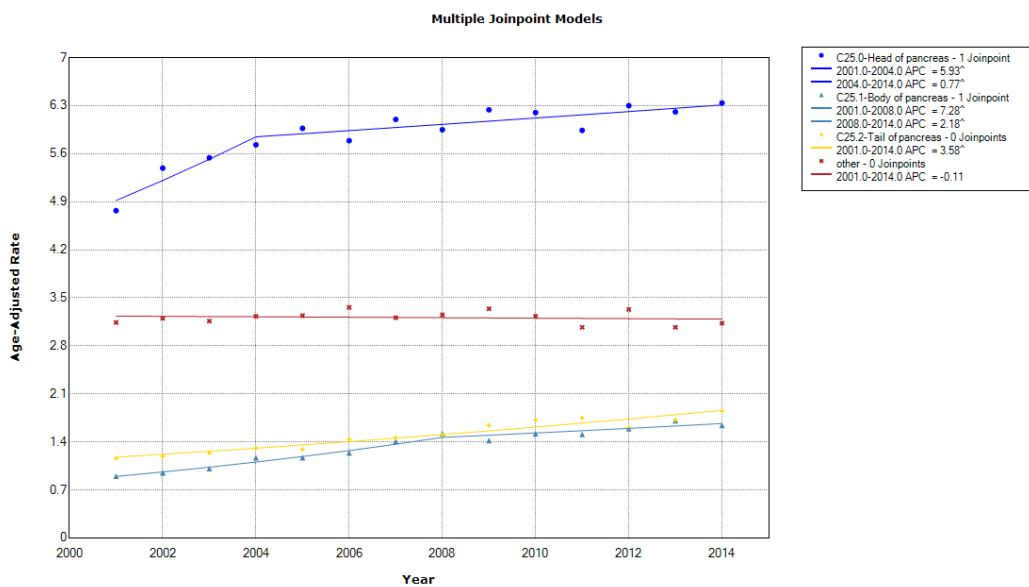

Figure S9.

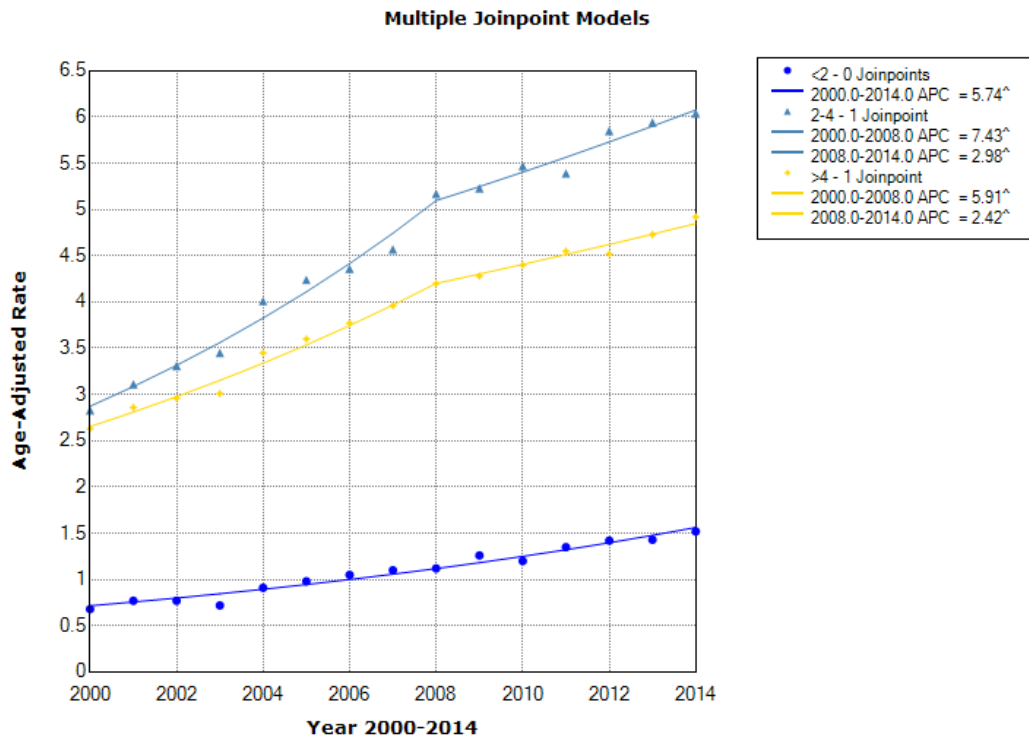

Figure S10.

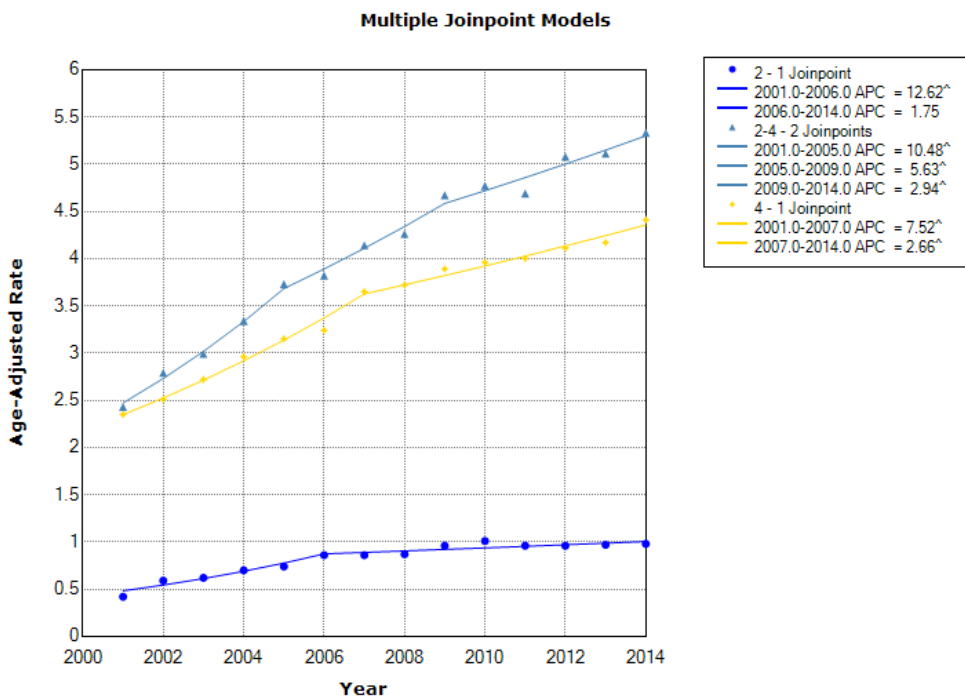

Supplement: Supplementary file 1 [file get_supplementary_file.php]
